# Supplementary material for: A wild rice-derived peptide R14 ameliorates monosodium urate crystals-induced IL-1β secretion through inhibition of NF-κB signaling and NLRP3 inflammasome activation
Source: PeerJ. 2023 May 12;11:e15295. doi: 10.7717/peerj.15295 (PMC10184658; doi:10.7717/peerj.15295)
Supplement: Supplemental Information 1 [file peerj-11-15295-s001.xlsx]

## Sheet: Figure 1
	Figure 1 R14 peptide showed no cytotoxicity in THP-1 macrophages after 24, 48 and 72 h incubation.
	Incubation time at 24h
	Cell viability (%)
	Treatment	concentration	Exp.1	Exp.2	Exp.3	Mean	SD
	Untreated	-	100	100	100	100	0
	Vehicle	-	98.7393	97.2064	98.0716	98.0058	0.768586
	R14	5 µM	100.161	98.4119	110.061	102.878	6.28157
		10 µM	102.481	98.2667	101.134	100.627	2.15246
		25 µM	93.5905	103.21	106.597	101.132	6.74736
		50 µM	98.235	101.143	93.0719	97.4832	4.08758
		100 µM	97.413	97.0321	92.2342	95.5598	2.88631
	Incubation time at 48h
	Cell viability (%)
	Treatment	concentration	Exp.1	Exp.2	Exp.3	Mean	SD
	Untreated	-	100	100	100	100	0
	Vehicle	-	104.712	105.067	108.067	105.949	1.8434
	R14	5 µM	112.464	108.727	101.775	107.656	5.42447
		10 µM	96.6443	120.407	102.134	106.395	12.4413
		25 µM	105.761	97.5072	100.409	101.226	4.18686
		50 µM	109.022	97.0707	96.8632	100.985	6.96058
		100 µM	105.795	95.5775	90.4287	97.267	7.82114
	Incubation time at 72h
	Cell viability (%)
	Treatment	concentration	Exp.1	Exp.2	Exp.3	Mean	SD
	Untreated	-	100	100	100	100	0
	Vehicle	-	104.658	103.166	103.054	103.626	0.89564
	R14	5 µM	102.573	112.408	102.73	105.904	5.63368
		10 µM	102.629	105.017	104.485	104.043	1.25364
		25 µM	99.968	111.726	100.819	104.171	6.55688
		50 µM	90.284	109.73	101.017	100.343	9.74025
		100 µM	91.9859	97.525	97.8049	95.7719	3.28174

## Sheet: Table 1
	Table 1 Hemolytic activity of R14 peptide
	Hemolysis (%)
	Treatment	concentration	Exp.1	Exp.2	Exp.3	Mean	SD
	Untreated	-	0	0	0	0	0
	1% Triton X-100	-	100	100	100	100	0
	Vehicle	-	0	0	0.0570125	0.0190042	0.0329162
	R14	5 µM	0	0	0	0	0
		10 µM	0	0	0.285063	0.0950209	0.164581
		25 µM	0	0	0.199544	0.0665146	0.115207
		50 µM	0	0	0.0855188	0.0285063	0.0493743
		100 µM	0	0	0.171038	0.0570125	0.0987486

## Sheet: Figure 2
	Figure 2 R14 peptide inhibited the IL-1β production in MSU crystals-induced THP-1 macrophages.
	IL-1β concentration (pg/mL)
	Treatment	Exp.1	Exp.2	Exp.3	Exp.4	Mean	SD
	Untreated	33.7808	39.9018	21.5141	31.3038	31.6251	7.64825
	MSU	298.222	287.746	391.919	356.393	333.57	49.2435
	MSU+R14 peptide 5 µM	262.679	286.954	230.144	253.808	258.396	23.4744
	MSU+R14 peptide 10 µM	266.48	292.557	224.77	251.019	258.706	28.3848
	MSU+R14 peptide 25 µM	227.551	250.172	193.592	209.19	220.126	24.3692
	MSU+R14 peptide 50 µM	107.551	139.77	121.379	124.456	123.289	13.2202
	MSU+R14 peptide 100 µM	112.474	110.345	106.954	109.537	109.828	2.28148
	MSU+colchicine 5 µM	389.577	400	573.732	323.356	421.667	106.908
	MSU+colchicine 10 µM	232.923	237.359	382.148	258.958	277.847	70.4579

## Sheet: Figure 3
	Figure 3 R14 peptide inhibited the activation of NLRP3 inflammasome and IL-1β synthesis in MSU crystals-induced THP-1 macrophages.
	The protein bands were measured by ImageJ software
	Relative protein expression: pro-caspase-1 / β-actin								Relative protein expression: pro-IL-1β / β-actin
	pro-caspase-1/ β-actin								pro-IL-1β / β-actin
	Treatment	Exp.1	Exp.2	Exp.3	Mean	SD			Treatment	Exp.1	Exp.2	Exp.3	Mean	SD
	Untreated	0.0713527	0.0170798	0.00906744	0.0325	0.0338851			Untreated	0.0667853	0.0695214	0.0406811	0.0589959	0.01592
	MSU	0.819896	0.78292	0.818229	0.807015	0.0208837			MSU	0.648782	0.539022	0.742996	0.6436	0.102086
	MSU+R14 peptide 5 µM	0.407964	0.187127	0.225066	0.273386	0.118082			MSU+R14 peptide 5 µM	0.293967	0.285047	0.231547	0.270187	0.0337594
	MSU+R14 peptide 10 µM	0.375937	0.0618154	0.258975	0.232242	0.158758			MSU+R14 peptide 10 µM	0.285748	0.110791	0.122701	0.17308	0.0977554
	MSU+R14 peptide 25 µM	0.162842	0.165275	0.0862994	0.138139	0.0449108			MSU+R14 peptide 25 µM	0.228692	0.0999937	0.302394	0.21036	0.102438
	MSU+R14 peptide 50 µM	0.131402	0.110163	0.113579	0.118381	0.0114051			MSU+R14 peptide 50 µM	0.266933	0.0565388	0.0798444	0.134439	0.115334
	MSU+R14 peptide 100 µM	0.115495	0.112003	0.0967676	0.108089	0.00995854			MSU+R14 peptide 100 µM	0.167894	0.0709886	0.110118	0.116334	0.0487506
	Relative protein expression: Intermediate caspase-1 / β-actin								Relative protein expression: IL-1β / β-actin
	Intermediated caspase-1 / β-actin								IL-1beta / β-actin
	Treatment	Exp.1	Exp.2	Exp.3	Mean	SD			Treatment	Exp.1	Exp.2	Exp.3	Mean	SD
	Untreated	0.037948	0.0829323	0.0393223	0.0534009	0.0255842			Untreated	0.033729	0.0387008	0.0170724	0.029834	0.011328
	MSU	0.596476	0.691511	0.573286	0.620424	0.0626455			MSU	0.557726	0.600819	0.540443	0.566329	0.0310938
	MSU+R14 peptide 5 µM	0.326392	0.118274	0.215417	0.220027	0.104136			MSU+R14 peptide 5 µM	0.307437	0.257258	0.250735	0.27181	0.0310256
	MSU+R14 peptide 10 µM	0.264326	0.0662719	0.198733	0.176444	0.100891			MSU+R14 peptide 10 µM	0.28119	0.215264	0.219688	0.238714	0.0368514
	MSU+R14 peptide 25 µM	0.179431	0.100575	0.128139	0.136048	0.0400182			MSU+R14 peptide 25 µM	0.186753	0.182705	0.318439	0.229299	0.0772241
	MSU+R14 peptide 50 µM	0.143028	0.104955	0.12997	0.125984	0.0193465			MSU+R14 peptide 50 µM	0.1986	0.22877	0.111215	0.179528	0.0610538
	MSU+R14 peptide 100 µM	0.0708678	0.0986057	0.0859831	0.0851522	0.0138876			MSU+R14 peptide 100 µM	0.110545	0.0853886	0.0519943	0.0826428	0.029372
	Relative protein expression: Caspase-1 / β-actin								Relative protein expression: NLRP3 / β-actin
	Caspase-1 / β-actin								NLRP3 / β-actin
	Treatment	Exp.1	Exp.2	Exp.3	Mean	SD			Treatment	Exp.1	Exp.2	Exp.3	Mean	SD
	Untreated	0.0236235	0.0445929	0.0229464	0.0303876	0.0123068			Untreated	0.469379	0.341627	0.445203	0.418736	0.0678637
	MSU	0.56006	0.506198	0.666834	0.577697	0.0817577			MSU	0.635486	0.425382	0.496945	0.519271	0.106817
	MSU+R14 peptide 5 µM	0.304549	0.129752	0.288436	0.240912	0.0966041			MSU+R14 peptide 5 µM	0.456344	0.354286	0.205963	0.338864	0.125901
	MSU+R14 peptide 10 µM	0.15631	0.0704338	0.235594	0.154112	0.0826019			MSU+R14 peptide 10 µM	0.448545	0.324256	0.401632	0.391478	0.0627636
	MSU+R14 peptide 25 µM	0.0505637	0.0918994	0.0646882	0.0690504	0.0210103			MSU+R14 peptide 25 µM	0.365964	0.340911	0.424354	0.377076	0.0428171
	MSU+R14 peptide 50 µM	0.0719475	0.0643854	0.0207451	0.0523593	0.0276386			MSU+R14 peptide 50 µM	0.214175	0.332941	0.393317	0.313478	0.0911434
	MSU+R14 peptide 100 µM	0.0331721	0.0681865	0.0289832	0.0434473	0.0215269			MSU+R14 peptide 100 µM	0.331386	0.260023	0.340848	0.310753	0.0441867

## Sheet: Figure 4
	Figure 4 R14 peptide suppressed the NF-κB activation in MSU crystals-induced THP-1 macrophages.
	The protein bands were measured by ImageJ software
	Relative protein expression: p-IκB-α / β-actin
	p-IκB / β-actin
	Treatment	Exp.1	Exp.2	Exp.3	Mean	SD
	Untreated	0.170629	0.198219	0.28676	0.218536	0.0606731
	MSU	0.443343	0.441143	0.389547	0.424678	0.0304439
	MSU+R14 peptide 5 µM	0.278544	0.286244	0.377181	0.31399	0.0548609
	MSU+R14 peptide 10 µM	0.317352	0.256009	0.154695	0.242686	0.0821432
	MSU+R14 peptide 25 µM	0.202234	0.235594	0.306378	0.248069	0.053181
	MSU+R14 peptide 50 µM	0.185772	0.216848	0.285065	0.229228	0.0507912
	MSU+R14 peptide 100 µM	0.163789	0.223239	0.269152	0.218726	0.0528262
	Relative protein expression: Nuclear-NF-κB / β-actin
	Nuclear-NF-κB / β-actin
	Treatment	Exp.1	Exp.2	Exp.3	Mean	SD
	Untreated	0.297725	0.158459	0.17071	0.208965	0.0771127
	MSU	0.453159	0.508568	0.470159	0.477295	0.0283852
	MSU+R14 peptide 5 µM	0.328318	0.182691	0.198549	0.236519	0.0798941
	MSU+R14 peptide 10 µM	0.260058	0.238635	0.2974	0.265364	0.0297395
	MSU+R14 peptide 25 µM	0.265885	0.215224	0.281168	0.254093	0.0345174
	MSU+R14 peptide 50 µM	0.199857	0.15614	0.290294	0.21543	0.0684199
	MSU+R14 peptide 100 µM	0.250273	0.21984	0.234118	0.234743	0.0152262

## Sheet: Figure 5
	Figure 5 R14 peptide reduced the intracellular ROS generation in MSU crystals-induced THP-1 macrophages.
	ROS (DCFDA Fluorescence intensity)
	Treatment	Exp.1	Exp.2	Exp.3	Mean	SD
	Untreated	3557	1666	1936.5	2386.5	1022.67
	MSU	9759	9920	10518.5	10065.8	400.201
	MSU+R14 peptide 5 µM	9067	7400	9234.5	8567.17	1014.26
	MSU+R14 peptide 10 µM	9380.5	8737	9473	9196.83	400.904
	MSU+R14 peptide 25 µM	8691	9101	8397	8729.67	353.589
	MSU+R14 peptide 50 µM	8298	7491	8784	8191	653.107
	MSU+R14 peptide 100 µM	5367	6418.5	7357.5	6381	995.78
